# Supplementary material for: QBOi El Nino Southern Oscillation experiments Part I: Overview of experiment design and ENSO modulation of the QBO
Source: Copernicus journal article supplement (doi:10.5194/egusphere-2024-3270), 2024-10-22
Supplement: Supplementary file [file egusphere-2024-3270-EC1-supplement.pdf]

Dear Prof. Kawatani and co-authors:

Both Anonymous referees have posted their comments on your manuscript (WCD 2024-3270). As per WCD policy, you are now to post a response on how you will address the referee's comments – after which I will make a decision on the manuscript.

Both reviewers have made excellent comments on the manuscript and call for major revisions which I agree with, particularly concerning the issues of “what is new? (Reviewer #2)”, the unexplored impact of unrealistically large forcing on the response (Reviewer #1), the lack of a discussion of agreement between the simulated QBOs and those observed (particularly the period) (Reviewer #1), and the use of very old reanalysis data throughout the manuscript (both Reviewers). To provide guidance in revising the manuscript so that it is acceptable for publication in WCD, below I itemize the issues that I expect will be addressed in a revised manuscript. I will also post these on the WCD page for the manuscript.

1. Reviewer #1 asks for an examination and justification of the impact of applying an ENSO forcing with an unrealizable amplitude. This should be addressed in the revised manuscript. One way to do this quantitatively is to run some of the models for ~20 years with realistic forcing and show how this impacts the wave forcing, say by producing Figs. 11 and 12 and comparing the amplitude of the wave forcing in the 3x El Nino with that with a 1x El Nino (and ditto for La Nina forcing).
2. Reviewer #1 calls for a necessary discussion of a deficiency in half the model models to simulate a QBO with a period that is consistent with that observed (see Reviewer #1 comments on Lines 266-76), and I agree. The reviewer's argument shows that four of the models have QBO periods that are unrealistic ( EC-EARTH: 20, MIROC-AGCM-LL: 26, MIROC-ESM: 21). I note that GISS is on the edge of being disqualified by this measure, and the unrealistic QBO in the La Nina simulations is a reason to add this model to the disqualified list. Hence, three of the six models in which wave driving is examined in Figs. 13 and 14 have QBOs with unrealistic periods. These issues should be mentioned in the abstract, in section 3, and in the discussion/summary in section 5.
3. Reviewer #2 asks whether the changes in the QBO period are sensitive to the method used to define a QBO cycle and whether ENSO impacts all phases of the QBO simulated by the models. I expect the method used to provide a robust period. However, it is not clear from the analysis presented whether El Nino accelerates all phases of the QBO, as is seen in the observations – or whether it impacts certain phases (such as the downward propagation of the westerly shear zone). In most of the models, the slope of the constant phase lines in the vertical-time plots with El Nino forcing experiment is indistinguishable from the slope in the La Nina forcing experiment (e.g., in Fig 2 for CESM1, EMAAC, MIROC-AGCM, MIROC-ESM and MRI-ESM2). Only in EC-Earth3.3 is the slope of the phase lines steeper with El Nino forcing than with La Nina forcing, as is also the case in the observations (Taguchi 2010, cf Fig. 9a with 9b). Repeating the straightforward analysis of Taguchi on the model results in this study would add considerable information on this issue.

4. Though not explicitly discussed by the Anonymous Reviewers, the changes in the period of the QBO due to the phase of ENSO (El Nino vs. La Nina) in six of the nine models are small compared to that observed, despite the 3x forcing applied. This should be noted in the abstract, in section 3, and noted and discussed in the summary in section 5. For example, the observational analysis in Taguchi (2010) suggests that a QBO in a perpetual El Nino would have a period of 25 months – 7 months faster than during a perpetual La Nina (a 26% change). Only three of the models in this study feature this amount of change (even under 3 times the observed ENSO forcing), only one of which has a GWD parameterization that responds to changes in convective activity. [Interestingly, all three of these models are also the only models to have an average QBO period that is consistent with that observed (~28 months).]
5. Both reviewers call for ERA 1 reanalysis data to be replaced with ERA 5 data throughout the manuscript and I agree. Also, Reviewer #2 provides references to recent literature that is relevant to this study.
6. Reviewer #2 questions what is learned from this study, given that it is already well established that gravity waves that cannot be explicitly resolved in (even high resolution) AGCMs are important for the driving of the observed QBO and that the response of the QBO to forcing is sensitive to the gravity wave parameterization scheme. The reviewer laments that this phase of the project did not deliver on the promise of a quantitative analysis of the spectral properties of the wave driving in each of the models, which would have made the current study novel. Though I am sympathetic to the Reviewer's concerns, I do see value in the current study, but the revised manuscript should persuasively argue for the merits of the study, given the superficial nature of the analysis. [Certainly, the inability of 4 or 5 of 9 models to simulate a QBO with a realistic period is further evidence of the sensitivity of the QBO to the parameterization of gravity waves (see comment 3 above). See also point 7 below.]
7. Reviewer #2 has made some good suggestions to improve the figure presentations. Moreover, adding observational results (from ERA5) to Figures 11, 12 and 14 would add important observational evidence for how ENSO actually does affect the wave driving, and provide important information for evaluating the efficacy of the ENSO impact on wave driving in the models. These plots would be sufficient to assuage Reviewer #2's comment "What is new?".
8. Figures 8, 9 and 10 are not necessary for the paper. That AGCMs reproduce the observed zonal average changes in circulation has been documented over and over again, and the changes in these figures are not useful/used in understanding the impact of ENSO on the QBO (Figs. 11 and 12 are sufficient). Similarly, the text on lines 443-504 should be deleted (it detracts from paper).

Finally, a minor comment on statistical significance: On Line 240, we find “ Emphasis will be placed on ... statistically significant at the 95% confidence level.” But elsewhere you mention 99% (e.g., Fig. 3 caption and on Line 287). Which is it? Line 241-242 goes on to say “Statistical significance is determined using a two-sided Student's t-test, sampling the maximum individual yearly mean data (e.g., 100 data points for models with 100-year integrations) for both the El Niño and La Niña runs”. This is fine for differences in the climatological mean, but not for discerning whether the period of the QBO is different in El Nino vs. La Nina, which has degrees of freedom equal to the number of QBO cycles (minus 1) in each respective regime. Using these degrees of freedom for each model, I find that all of the differences in Fig. 2 are indeed statistically significant at 99%.

Regards,

David Battisti
